# Supplementary material
Source: publisher site journal article supplement (https://www.dovepress.com/article/334942)
Supplement: Supplementary file 1 [file get_supplementary_file.php]

**eSupplementary table 1.** Details extracted from the original study where samples are taken from.

| **Acupuncture treatment** | - Performed twice weekly, 8 sessions spread over 30 days, by designated TCM physicians. - These are the points used: 5 around the eyes (ST1 (cheng qi), BL2 (cuan zhu), GB20 (feng chi), Tai Yang, Three tear needles) and 3 on the limbs (SP6 (san yin jiao), LI4 (he gu), ST36(zu san li)). - Needle dimensions (diameter X length) :   Around eyes; 0.25 x 13mm  Behind ear (feng chi): 0.25 x 25mm  Upper\lower limbs: 0.30 X 25mm   - Duration in points (per treatment):20 minutes - Depth of penetration : 1-2 mm. |
| --- | --- |
| **Inclusion criteria** | - 40-85 years old - Symptom [SPEED] score >6, and   tear break-up time <10 s or Schirmer’s test <10 mm/5 min), and  any corneal fluorescein dye staining   - Lung-kidney Yin deficiency (>6 in standard questionnaire) - Visual acuity better than Snellen equivalent of 6/60 |
| **Exclusion criteria** | - Ophthalmic disease (eg., extraocular muscle palsies, eyelid malposition, trichiasis, glaucoma, ocular allergies, including allergic conjunctivitis, sinusitis, eczema and atopic keratoconjuntivitis) - Eye surgeries including LASIK (laser-assisted in situ keratomileusis, within 1 year); eye-related trauma or contact lens wear (within 1 year) or punctal occlusion - Need to use topical - Ciclosporin, steroid, antimicrobial, inflammatory formulations - Disease requiring ongoing systemic medication (except hypertension and lipidaemia) - Pregnancy - Any TCM therapy in past month |
| **Study procedure: Tear break up time** | - Fluoret® (1 mg Fluorescein Sodium Ophthalmic Strip (Bausch & Lomb, North Bridgewater, New Jersey, USA)) introduced after minimal wetting with normal saline to fornix of each eye. - After blinking a few times, participant will open eyes without blinking as long as possible. - TBUT recorded as time between eyelid opening and appearance of any dry spot\area on cornea. - Three readings taken each eye, and averaged. |
| **Study procedure: Corneal staining** | - Graded as in cornea and contact lens research unit (CCLRU) study. - Five corneal zones. Each zone : scores of 0 (no staining/scarring) to 4 (severe staining). |
| **Study procedure: Schirmer’s test** | - Schirmer’s I test performed without anesthesia - Use 5 mm wide strips (4701001; Clement Clarke International, Harlow, Essex, UK). - Placed on lower fornix at outer one-third/inner two thirds junction of lower lid. - Instructed to close the eyes gently. - Length of wetting was recorded from notch on the strips after 5 minutes. - Any reading >35 mm recorded as 35 mm for analysis. |
| **Study procedure: Best corrected spectacle visual acuity** | - Best corrected spectacle visual acuity was tested at 4 meters - Lighthouse International’s distance visual acuity number test (cat. no. C102) (Lighthouse International, New York, USA). - Recorded in Snellen format, converted to the corresponding log MAR equivalent for analysis. |

**eSupplementary table 2.** Clinical and demographic factors of participants

|  | **Systane Ultra only (n=15)** | **Acupuncture and systane ultra (n=15)** |
| --- | --- | --- |
| **Age (years)** | 60.3 ± 8.0 | 56.9±7.9 |
| **Male (no/total)** | 5/15 | 1/15 |
| **SPEED†**  **score**  Mean± SD | 8.1±3.8* | 7.0±3.4 |
| **Schirmer I (mm)**  Mean± SD | 14.0±7.6 | 14.8±7.7 |
| **Tear Break up times (s)**  Mean± SD | 2.2±1.1 | 2.0±0.5 |
| **Cornea Staining**  Mean±SD  Median (min, max) |  |  |
| Superior | 0.2±0.4  0.0 (0.0,2.0) | 0.3±0.6  0.0 (0.0, 2.0) |
| Inferior | 0.9±1.0  1.0 (0.0,3.5) | 0.9±1.0  1.0 (0.0, 3.0) |
| Central | 0.4±1.0  0.0 (0.0,3.5) | 0.2±0.6  0.0 (0.0, 2.5) |
| Nasal | 0.7±1.0  0.0 (0.0,3.5) | 0.4±0.7  0.0 (0.0, 1.5) |
| Temporal | 0.4±1.0  0.0 (0.0,3.5) | 0.2±0.5  0.0 (0.0, 1.5) |

**†** Standardised patient evaluation of eye dryness questionnaire
